# Supplementary material
Source: PubMed Central journal article supplement (PMC4303486)
Supplement: NIHMS638865-supplement-Supplemental_Tables.pdf [file NIHMS638865-supplement-Supplemental_Tables.pdf]

## SUPPLEMENTAL MATERIAL

**Supplemental Table 1.** Baseline clinical characteristics of patients at DAPT-participating vs. non-participating hospitals.

| <b>Characteristic</b>                     | <b>Patients at DAPT-Participating Hospital<br/>(n = 485177)</b> | <b>Patients at Non-Participating Hospital<br/>(n = 654755)</b> | <b>Standardized Difference (%)</b> |
|-------------------------------------------|-----------------------------------------------------------------|----------------------------------------------------------------|------------------------------------|
| Age                                       | 64.8 ± 12.0                                                     | 64.6 ± 12.1                                                    | 1.1                                |
| BMI (kg/m <sup>2</sup> )                  | 30.0 ± 6.4                                                      | 30.0 ± 6.5                                                     | 0.6                                |
| Female                                    | 32.3                                                            | 32.8                                                           | -1.0                               |
| <b>Race/ethnicity</b>                     |                                                                 |                                                                |                                    |
| American Indian or Alaska Native          | 0.5                                                             | 0.5                                                            | 0.2                                |
| Asian                                     | 1.7                                                             | 2.5                                                            | -5.3                               |
| Black                                     | 8.4                                                             | 7.8                                                            | 2.1                                |
| Hispanic                                  | 4.0                                                             | 5.5                                                            | -6.7                               |
| Native Hawaiian or Other Pacific Islander | 0.2                                                             | 0.2                                                            | -0.5                               |
| White                                     | 88.6                                                            | 88.2                                                           | 1.1                                |
| No insurance                              | 6.0                                                             | 6.6                                                            | -2.4                               |
| <b>Co-morbidities</b>                     |                                                                 |                                                                |                                    |
| Cerebrovascular disease (%)               | 12.9                                                            | 11.7                                                           | 3.7                                |
| CHF, current                              | 9.5                                                             | 9.7                                                            | -0.8                               |
| CHF, previous                             | 12.3                                                            | 11.2                                                           | 3.4                                |
| Chronic Lung Disease (%)                  | 15.0                                                            | 15.1                                                           | -0.4                               |
| Current/recent smoker                     | 26.6                                                            | 28.3                                                           | -3.6                               |
| Diabetes                                  | 36.5                                                            | 35.7                                                           | 1.7                                |
| Not on insulin                            | 23.0                                                            | 23.0                                                           | -0.1                               |
| On insulin                                | 13.5                                                            | 12.7                                                           | 2.5                                |
| GFR (mL/min/1.73 m <sup>2</sup> )*        | 75.7                                                            | 75.4                                                           | 0.9                                |
| Hypertension (%)                          | 82.8                                                            | 81.1                                                           | 4.5                                |
| Peripheral vascular disease (%)           | 13.3                                                            | 11.9                                                           | 4.2                                |
| Previous MI                               | 30.9                                                            | 29.1                                                           | 4.0                                |
| <b>Previous procedures</b>                |                                                                 |                                                                |                                    |
| PCI                                       | 42.3                                                            | 38.9                                                           | 6.8                                |
| CABG                                      | 19.9                                                            | 17.9                                                           | 5.2                                |
| <b>Presentation</b>                       |                                                                 |                                                                |                                    |
| No angina                                 | 9.0                                                             | 9.3                                                            | -0.8                               |
| Atypical chest pain                       | 2.7                                                             | 3.2                                                            | -2.5                               |
| Stable angina                             | 18.8                                                            | 16.9                                                           | 5.0                                |
| Unstable angina                           | 37.2                                                            | 36.0                                                           | 2.6                                |

|           |      |      |      |
|-----------|------|------|------|
| Non-STEMI | 18.0 | 17.7 | 0.6  |
| STEMI     | 14.2 | 17.0 | -7.6 |

Values are percent or mean  $\pm$  standard deviation. Abbreviations: BMI, body mass index;

CABG, coronary artery bypass grafting; CHF, congestive heart failure; GFR, glomerular filtration rate by MDRD equation estimate; MI, myocardial infarction; PCI, percutaneous coronary intervention; STEMI, ST elevation myocardial infarction. \*Creatinine was missing in 8% of patients. All other elements had < 2% missing data.

**Supplemental Table 2.** Procedural characteristics of patients at DAPT-participating vs. non-participating hospitals.

| <b>Procedural Characteristic</b> | <b>Patients at DAPT-Participating Hospital<br/>(n = 485177)</b> | <b>Patients at Non-Participating Hospital<br/>(n = 654755)</b> | <b>Standardized Difference (%)</b> |
|----------------------------------|-----------------------------------------------------------------|----------------------------------------------------------------|------------------------------------|
| <i>PCI indication</i>            |                                                                 |                                                                |                                    |
| Elective                         | 45.8                                                            | 44.2                                                           | 3.1                                |
| Urgent                           | 38.1                                                            | 36.9                                                           | 2.4                                |
| Emergent                         | 15.8                                                            | 18.4                                                           | -7.1                               |
| Salvage                          | 0.3                                                             | 0.3                                                            | -1.0                               |
| <i>Type of stent</i>             |                                                                 |                                                                |                                    |
| Any DES                          | 69.9                                                            | 69.5                                                           | 0.8                                |
| BMS only                         | 21.6                                                            | 21.5                                                           | 0.1                                |
| No stent                         | 8.6                                                             | 9.0                                                            | -1.5                               |
| <i>Segment category</i>          |                                                                 |                                                                |                                    |
| Any LMCA                         | 1.9                                                             | 1.6                                                            | 2.8                                |
| Proximal LAD                     | 14.4                                                            | 15.3                                                           | -2.7                               |
| Arterial graft                   | 0.5                                                             | 0.5                                                            | -0.1                               |
| Vein graft                       | 6.4                                                             | 5.7                                                            | 2.6                                |
| Multi-vessel                     | 14.1                                                            | 13.2                                                           | 2.5                                |
| Previously treated lesion        | 11.6                                                            | 10.6                                                           | 3.3                                |
| Bifurcation lesion               | 10.4                                                            | 11.5                                                           | -3.6                               |
| <i>Discharge medications</i>     |                                                                 |                                                                |                                    |
| Aspirin                          | 97.2                                                            | 95.4                                                           | 9.4                                |
| Clopidogrel                      | 84.9                                                            | 83.9                                                           | 2.8                                |
| Prasugrel*                       | 12.2                                                            | 11.8                                                           | 1.3                                |

Values are percent. Abbreviations: DES, drug-eluting stent; LAD, left anterior descending artery; LMCA, left main coronary artery; PCI, percutaneous coronary intervention. \*Data on Prasugrel receipt was missing in 5% of patients. All other elements had < 2% missing data.

**Supplemental Table 3.** Baseline clinical characteristics of patients receiving DES enrolled in the DAPT trial and those eligible to be enrolled in the CathPCI registry, limited to DAPT-participating hospitals.

| <b>Characteristic</b>                   | <b>DAPT US DES Enrolled<br/>(n = 21481)</b> | <b>CathPCI DAPT-Eligible DES Patients<br/>(n =320943)</b> | <b>Standardized Difference (%)</b> |
|-----------------------------------------|---------------------------------------------|-----------------------------------------------------------|------------------------------------|
| <b>Age</b>                              | 62.2 ± 10.6                                 | 64.4 ± 11.5                                               | -19.9                              |
| <b>Female</b>                           | 28.8                                        | 32.2                                                      | -7.4                               |
| <b>Race</b>                             |                                             |                                                           |                                    |
| <b>American Indian or Alaska Native</b> | 0.4                                         | 0.5                                                       | -1.1                               |
| <b>Asian</b>                            | 1.1                                         | 1.8                                                       | -6.2                               |
| <b>Black</b>                            | 7.1                                         | 7.6                                                       | -1.7                               |
| <b>Hispanic ethnicity</b>               | 4.4                                         | 3.9                                                       | -2.5                               |
| <b>Native Hawaiian</b>                  | 0.2                                         | 0.2                                                       | 1.1                                |
| <b>White</b>                            | 89.4                                        | 89.3                                                      | 0.3                                |
| <b>BMI (kg/m<sup>2</sup>)</b>           | 30.6 ± 5.9                                  | 30.2 ± 6.3                                                | 6.5                                |
| <b>Co-morbidities</b>                   |                                             |                                                           |                                    |
| <b>Smoker</b>                           | 25.5                                        | 24.7                                                      | 1.8                                |
| <b>Diabetes</b>                         | 33.8                                        | 36.9                                                      | -6.4                               |
| <b>Not on insulin</b>                   | 22.3                                        | 23.4                                                      | -2.6                               |
| <b>On insulin</b>                       | 11.5                                        | 13.5                                                      | -6.0                               |
| <b>Hypertension</b>                     | 79.1                                        | 83.3                                                      | -10.8                              |
| <b>Peripheral arterial disease</b>      | 7.3                                         | 12.6                                                      | -17.8                              |
| <b>Prior CHF</b>                        | 6.8                                         | 11.0                                                      | -14.9                              |
| <b>Prior MI</b>                         | 23.8                                        | 30.6                                                      | -15.4                              |
| <b>Prior procedures</b>                 |                                             |                                                           |                                    |
| <b>PCI</b>                              | 35.6                                        | 44.4                                                      | -18.1                              |
| <b>CABG</b>                             | 14.5                                        | 19.8                                                      | -14.2                              |
| <b>Presentation</b>                     |                                             |                                                           |                                    |
| <b>Non-STEMI</b>                        | 14.6                                        | 16.4                                                      | -5.0                               |
| <b>STEMI</b>                            | 8.6                                         | 10.0                                                      | -4.6                               |

Values are percent or mean ± standard deviation. Abbreviations: BMI, body mass index; CABG, coronary artery bypass grafting; CHF, congestive heart failure; MI, myocardial infarction; PCI, percutaneous coronary intervention; STEMI, ST elevation myocardial infarction.

**Supplemental Table 4.** Procedural characteristics of patients receiving DES enrolled in the DAPT trial versus DAPT-eligible patients within the CathPCI registry, limited to DAPT-participating hospitals.

| <b>Procedural Characteristic</b>                                         | <b>DAPT US DES Enrolled (n = 21483\1)</b> | <b>CathPCI DAPT-Eligible (n = 320943)</b> | <b>Standardized Difference (%)</b> |
|--------------------------------------------------------------------------|-------------------------------------------|-------------------------------------------|------------------------------------|
| <b>High Risk Feature</b>                                                 |                                           |                                           |                                    |
| <b>Left Main</b>                                                         | 1.5                                       | 2.8                                       | -8.9                               |
| <b>Proximal LAD</b>                                                      | 19.0                                      | 18.3                                      | 1.9                                |
| <b>Arterial graft</b>                                                    | 0.7                                       | 0.5                                       | 2.3                                |
| <b>Vein graft</b>                                                        | 3.6                                       | 5.8                                       | -10.5                              |
| <b>Multi-vessel</b>                                                      | 11.1                                      | 15.6                                      | -13.3                              |
| <b>Stent Type</b>                                                        |                                           |                                           |                                    |
| <b>Everolimus</b>                                                        | 47.7                                      | 63.0                                      | -31.3                              |
| <b>Zotarolimus</b>                                                       | 14.7                                      | 10.5                                      | 12.9                               |
| <b>Paclitaxel</b>                                                        | 21.9                                      | 12.5                                      | 25.1                               |
| <b>Sirolimus</b>                                                         | 13.1                                      | 9.7                                       | 10.6                               |
| <b>Multiple Types</b>                                                    | 2.7                                       | 4.3                                       | -9.0                               |
| <b>Discharge medications</b>                                             |                                           |                                           |                                    |
| <b>Aspirin</b>                                                           | 99.4                                      | 98.6                                      | 11.9                               |
| <b>Clopidogrel</b>                                                       | 69.2                                      | 86.6                                      | -41.8                              |
| <b>Prasugrel*</b>                                                        | 30.7                                      | 14.1                                      | 39.0                               |
| <b>Outcome</b>                                                           |                                           |                                           |                                    |
| <b>Post-Procedure Length of stay (days, mean <math>\pm</math> SD)</b>    | 1.3 $\pm$ 1.2                             | 2.7 $\pm$ 3.4                             | -56.6                              |
| <b>Post-Procedure Length of stay (days, median, interquartile range)</b> | 1.00 (1.00, 1.00)                         | 2.00 (2.00, 3.00)                         | -                                  |

Values are percent unless otherwise noted. Abbreviations: LAD, left anterior descending; SD, standard deviation. Missing data were < 4% for all elements. \*One of the 4 manufacturer-sponsored studies contributing to the DAPT Study mandated treatment with prasugrel after PCI.
